# Supplementary material for: Facile fabrication of CdS–poly(3-hexylthiophene) hybrid film with improved photo-current response for heterojunction solar cells
Source: Royal Society of Chemistry journal article supplement (doi:10.1039/c3nj00538k), 2013-01-01
Supplement: c3nj00538k.pdf [file c3nj00538k.pdf]

# Facile fabrication of CdS/poly(3-hexylthiophene) hybrid film with improved photo-current response for heterojunction solar cells

Huimin Jia<sup>a,b</sup>, Weiwei He<sup>a</sup>, Yidong Zhang<sup>a</sup>, Yan Lei<sup>a</sup>, Yong Xiang<sup>b</sup>, Shu Zhang<sup>b</sup>, Zhi  
Zheng<sup>a\*</sup>

*Key Laboratory of Micro-Nano Materials for Energy Storage and Conversion of  
Henan Province and Institute of Surface Micro and Nano Materials, Xuchang  
University, Henan 461000, P. R. China.*

*State Key Laboratory of Electronic Thin Film & Integrated Devices, School of Energy  
Science and Engineering, University of Electronic Science and Technology of China,  
Sichuan 611731, P. R. China.*

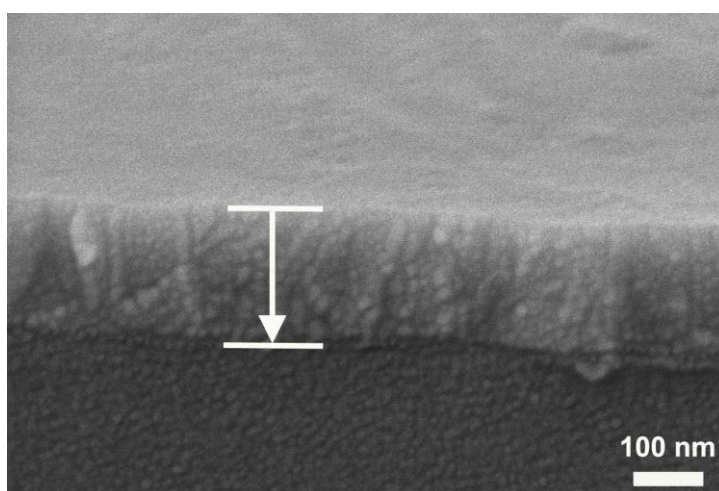

**Figure S1.** The cross-sectional SEM image of CdS/P3HT hybrid film.

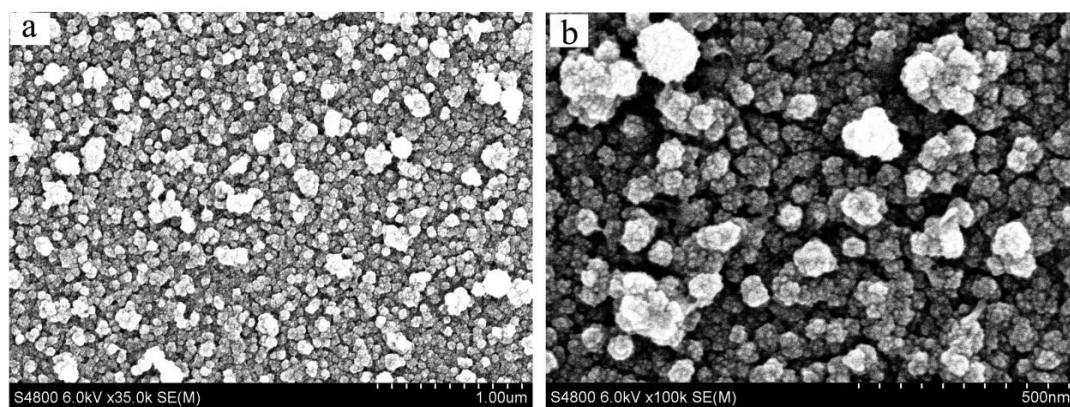

**Figure S2.** SEM images of the CdS film obtained by solvothermal treatment of the 80 nm cadmium film with 0.05 mmol S powder in ethanol medium at 160 °C for 12 h (a) low magnification and (b) high magnification.
